# Supplementary material for: Enumerating Pathways of Proton Abstraction Based on a Spatial and Electrostatic Analysis of Residues in the Catalytic Site
Source: PubMed Central journal article supplement (PMC3379984; doi:10.1371/journal.pone.0039577), 2012-06-20
Supplement: pone.0039577.s001.pdf [file pone.0039577.s001.pdf]

Supplementary Table. 1: Potential difference thresholds for proton transfer. Potential differences are in units of  $kT/e$  where  $k$  is Boltzmann's constant,  $T$  is the temperature in K and  $e$  is the charge of an electron.

| Amino acid types in proton transfer | Potential difference |
|-------------------------------------|----------------------|
| Acid->Base                          | 50                   |
| Base->Acid                          | 250                  |
| Acid->Acid                          | 150                  |
| Base->Base                          | 130                  |
| Other->Base                         | 100                  |
| Other->Amide                        | 400                  |
| Amide->Other                        | 250                  |
