# Supplementary material for: Enumerating Pathways of Proton Abstraction Based on a Spatial and Electrostatic Analysis of Residues in the Catalytic Site
Source: PubMed Central journal article supplement (PMC3379984; doi:10.1371/journal.pone.0039577), 2012-06-20
Supplement: pone.0039577.s002.pdf [file pone.0039577.s002.pdf]

Supplementary Table. 2: Parameters used in PRISM and their default values

| Name        | Description                                                                             | Default value |
|-------------|-----------------------------------------------------------------------------------------|---------------|
| MAXRADIUS   | size of the active site                                                                 | 10 Å          |
| MAXDIST     | distance over with PA is allowed between two atoms                                      | 5 Å           |
| BALLRADIUS  | radius of the ball which is between two atoms to ascertain spatial hindrance.           | 1 Å           |
| ADJUSTRATIO | ratio in which the potential difference is distributed between the atoms involved in PA | 3/4           |
